# Supplementary material
Source: publisher site journal article supplement (https://www.spandidos-publications.com/5440/downloadSupplementary)
Supplement: Supplementary file 1 [file downloadSupplementary]

## Sheet: different.miRNA
Table SI. Differentially expressed miRNAs identified between H. pylori infected GC and adjacent tissues by sequencing analysis
miRNA	5-N	5-T	log2(Fold_change)	P-value	Website
hsa-miR-196a-5p	5	3114	8.61791	1.24e-18	http://www.mirbase.org/cgi-bin/mature.pl?mature_acc=MIMAT0000226
hsa-miR-873-5p	820	13	-6.59925	7.33e-14	http://www.mirbase.org/cgi-bin/mature.pl?mature_acc=MIMAT0004953
hsa-miR-514a-3p	432	12	-5.7889	1.77e-11	http://www.mirbase.org/cgi-bin/mature.pl?mature_acc=MIMAT0002883
hsa-miR-144-5p	668	23	-5.48767	3.17e-11	http://www.mirbase.org/cgi-bin/mature.pl?mature_acc=MIMAT0004600
hsa-miR-141-3p	17597	939	-4.86466	2.39e-10	http://www.mirbase.org/cgi-bin/mature.pl?mature_acc=MIMAT0000432
hsa-miR-144-3p	281	12	-5.16862	9.81e-10	http://www.mirbase.org/cgi-bin/mature.pl?mature_acc=MIMAT0000436
hsa-miR-375-3p	94598	6184	-4.57199	1.51e-09	http://www.mirbase.org/cgi-bin/mature.pl?mature_acc=MIMAT0000728
hsa-miR-561-5p	79	0	-9.65884	2.26e-09	http://www.mirbase.org/cgi-bin/mature.pl?mature_acc=MIMAT0022706
hsa-miR-431-5p	0	148	9.92738	3.32e-09	http://www.mirbase.org/cgi-bin/mature.pl?mature_acc=MIMAT0001625
hsa-miR-148a-3p	2482994	179436	-4.42737	3.81e-09	http://www.mirbase.org/cgi-bin/mature.pl?mature_acc=MIMAT0000243
hsa-miR-374a-3p	467	28	-4.68924	3.97e-09	http://www.mirbase.org/cgi-bin/mature.pl?mature_acc=MIMAT0004688
hsa-miR-187-3p	0	144	9.88789	4.47e-09	http://www.mirbase.org/cgi-bin/mature.pl?mature_acc=MIMAT0000262
hsa-miR-483-3p	0	107	9.45996	5.8e-09	http://www.mirbase.org/cgi-bin/mature.pl?mature_acc=MIMAT0002173
hsa-miR-7-5p	125567	10473	-4.22052	1.41e-08	http://www.mirbase.org/cgi-bin/mature.pl?mature_acc=MIMAT0000252
hsa-miR-153-3p	52	0	-9.05642	7.6e-08	http://www.mirbase.org/cgi-bin/mature.pl?mature_acc=MIMAT0000439
hsa-miR-378e	171	12	-4.45237	8.48e-08	http://www.mirbase.org/cgi-bin/mature.pl?mature_acc=MIMAT0018927
hsa-miR-196b-5p	29	777	4.10238	1.1e-07	http://www.mirbase.org/cgi-bin/mature.pl?mature_acc=MIMAT0001080
hsa-miR-556-5p	48	0	-8.94117	1.47e-07	http://www.mirbase.org/cgi-bin/mature.pl?mature_acc=MIMAT0003220
hsa-miR-12135	136	9	-4.53122	1.58e-07	http://www.mirbase.org/cgi-bin/mature.pl?mature_acc=MIMAT0049031
hsa-miR-32-5p	1234	134	-3.83834	2.19e-07	http://www.mirbase.org/cgi-bin/mature.pl?mature_acc=MIMAT0000090
hsa-miR-204-5p	2855	327	-3.76233	2.82e-07	http://www.mirbase.org/cgi-bin/mature.pl?mature_acc=MIMAT0000265
hsa-miR-204-3p	43	0	-8.78281	3.45e-07	http://www.mirbase.org/cgi-bin/mature.pl?mature_acc=MIMAT0022693
hsa-miR-200a-3p	218924	26521	-3.68204	3.91e-07	http://www.mirbase.org/cgi-bin/mature.pl?mature_acc=MIMAT0000682
hsa-miR-429	25069	3230	-3.59306	6.71e-07	http://www.mirbase.org/cgi-bin/mature.pl?mature_acc=MIMAT0001536
hsa-miR-135a-5p	1554	196	-3.62286	7.25e-07	http://www.mirbase.org/cgi-bin/mature.pl?mature_acc=MIMAT0000428
hsa-miR-378d	4618	610	-3.55689	9.01e-07	http://www.mirbase.org/cgi-bin/mature.pl?mature_acc=MIMAT0018926
hsa-miR-9-3p	254	30	-3.71188	1.16e-06	http://www.mirbase.org/cgi-bin/mature.pl?mature_acc=MIMAT0000442
hsa-miR-3065-3p	35	0	-8.48658	1.72e-06	http://www.mirbase.org/cgi-bin/mature.pl?mature_acc=MIMAT0015378
hsa-miR-31-5p	5226	748	-3.44116	1.74e-06	http://www.mirbase.org/cgi-bin/mature.pl?mature_acc=MIMAT0000089
hsa-miR-876-3p	33	0	-8.40194	2.94e-06	http://www.mirbase.org/cgi-bin/mature.pl?mature_acc=MIMAT0004925
hsa-miR-1277-5p	32	0	-8.35768	3.54e-06	http://www.mirbase.org/cgi-bin/mature.pl?mature_acc=MIMAT0022724
hsa-miR-34b-3p	0	46	8.24477	4.28e-06	http://www.mirbase.org/cgi-bin/mature.pl?mature_acc=MIMAT0004676
hsa-miR-577	96	11	-3.74401	5.5e-06	http://www.mirbase.org/cgi-bin/mature.pl?mature_acc=MIMAT0003242
hsa-miR-214-3p	876	12767	3.22837	5.79e-06	http://www.mirbase.org/cgi-bin/mature.pl?mature_acc=MIMAT0000271
hsa-miR-378h	30	0	-8.26486	6.32e-06	http://www.mirbase.org/cgi-bin/mature.pl?mature_acc=MIMAT0018984
hsa-miR-148a-5p	8185	1388	-3.19666	6.88e-06	http://www.mirbase.org/cgi-bin/mature.pl?mature_acc=MIMAT0004549
hsa-miR-487a-5p	0	43	8.1478	7.72e-06	http://www.mirbase.org/cgi-bin/mature.pl?mature_acc=MIMAT0026559
hsa-miR-141-5p	290	45	-3.3205	9.17e-06	http://www.mirbase.org/cgi-bin/mature.pl?mature_acc=MIMAT0004598
hsa-miR-888-5p	28	0	-8.16566	9.48e-06	http://www.mirbase.org/cgi-bin/mature.pl?mature_acc=MIMAT0004916
hsa-miR-34c-3p	0	40	8.04385	1.17e-05	http://www.mirbase.org/cgi-bin/mature.pl?mature_acc=MIMAT0004677
hsa-miR-675-3p	0	39	8.00746	1.45e-05	http://www.mirbase.org/cgi-bin/mature.pl?mature_acc=MIMAT0006790
hsa-miR-378c	7220	1357	-3.04826	1.59e-05	http://www.mirbase.org/cgi-bin/mature.pl?mature_acc=MIMAT0016847
hsa-miR-362-3p	56	5	-4.08153	1.67e-05	http://www.mirbase.org/cgi-bin/mature.pl?mature_acc=MIMAT0004683
hsa-miR-101-3p	32596	6335	-3.00008	2.05e-05	http://www.mirbase.org/cgi-bin/mature.pl?mature_acc=MIMAT0000099
hsa-miR-3664-3p	25	0	-8.00276	2.25e-05	http://www.mirbase.org/cgi-bin/mature.pl?mature_acc=MIMAT0019220
hsa-miR-590-3p	93	13	-3.46028	2.32e-05	http://www.mirbase.org/cgi-bin/mature.pl?mature_acc=MIMAT0004801
hsa-miR-150-5p	2199	26530	2.95582	2.63e-05	http://www.mirbase.org/cgi-bin/mature.pl?mature_acc=MIMAT0000451
hsa-miR-29c-3p	3519	701	-2.96423	2.66e-05	http://www.mirbase.org/cgi-bin/mature.pl?mature_acc=MIMAT0000681
hsa-miR-1266-5p	24	0	-7.9441	2.82e-05	http://www.mirbase.org/cgi-bin/mature.pl?mature_acc=MIMAT0005920
hsa-miR-6511b-5p	0	36	7.89245	2.82e-05	http://www.mirbase.org/cgi-bin/mature.pl?mature_acc=MIMAT0025847
hsa-miR-190a-5p	83	12	-3.41043	3.09e-05	http://www.mirbase.org/cgi-bin/mature.pl?mature_acc=MIMAT0000458
hsa-miR-3065-5p	122	21	-3.16599	4.17e-05	http://www.mirbase.org/cgi-bin/mature.pl?mature_acc=MIMAT0015066
hsa-miR-3128	22	0	-7.8191	4.53e-05	http://www.mirbase.org/cgi-bin/mature.pl?mature_acc=MIMAT0014991
hsa-miR-1302	22	0	-7.8191	4.53e-05	http://www.mirbase.org/cgi-bin/mature.pl?mature_acc=MIMAT0005890
hsa-miR-935	0	33	7.76747	4.53e-05	http://www.mirbase.org/cgi-bin/mature.pl?mature_acc=MIMAT0004978
hsa-miR-30e-5p	36037	7757	-2.85271	4.59e-05	http://www.mirbase.org/cgi-bin/mature.pl?mature_acc=MIMAT0000692
hsa-miR-378f	735	157	-2.8626	5.49e-05	http://www.mirbase.org/cgi-bin/mature.pl?mature_acc=MIMAT0018932
hsa-miR-1-3p	13023	2890	-2.80868	5.85e-05	http://www.mirbase.org/cgi-bin/mature.pl?mature_acc=MIMAT0000416
hsa-miR-592	109	19	-3.14687	6.64e-05	http://www.mirbase.org/cgi-bin/mature.pl?mature_acc=MIMAT0003260
hsa-miR-129-5p	1397	314	-2.78973	7.26e-05	http://www.mirbase.org/cgi-bin/mature.pl?mature_acc=MIMAT0000242
hsa-miR-4510	0	31	7.6777	7.45e-05	http://www.mirbase.org/cgi-bin/mature.pl?mature_acc=MIMAT0019047
hsa-let-7a-2-3p	0	30	7.63063	7.45e-05	http://www.mirbase.org/cgi-bin/mature.pl?mature_acc=MIMAT0010195
hsa-miR-485-3p	19	241	3.02163	7.59e-05	http://www.mirbase.org/cgi-bin/mature.pl?mature_acc=MIMAT0002176
hsa-miR-203b-3p	67	10	-3.36131	8.52e-05	http://www.mirbase.org/cgi-bin/mature.pl?mature_acc=MIMAT0019814
hsa-miR-129-2-3p	131	25	-3.01872	9.41e-05	http://www.mirbase.org/cgi-bin/mature.pl?mature_acc=MIMAT0004605
hsa-miR-31-3p	131	25	-3.01872	9.41e-05	http://www.mirbase.org/cgi-bin/mature.pl?mature_acc=MIMAT0004504
hsa-miR-1224-5p	20	0	-7.68224	9.64e-05	http://www.mirbase.org/cgi-bin/mature.pl?mature_acc=MIMAT0005458
hsa-miR-582-5p	925	217	-2.72773	0.000105612	http://www.mirbase.org/cgi-bin/mature.pl?mature_acc=MIMAT0003247
hsa-miR-372-3p	0	28	7.53162	0.000125561	http://www.mirbase.org/cgi-bin/mature.pl?mature_acc=MIMAT0000724
hsa-miR-125b-2-3p	207	2022	2.65068	0.000156687	http://www.mirbase.org/cgi-bin/mature.pl?mature_acc=MIMAT0004603
hsa-miR-125b-1-3p	105	1026	2.65061	0.000182139	http://www.mirbase.org/cgi-bin/mature.pl?mature_acc=MIMAT0004592
hsa-miR-409-3p	284	2703	2.61335	0.000182238	http://www.mirbase.org/cgi-bin/mature.pl?mature_acc=MIMAT0001639
hsa-miR-1307-5p	459	116	-2.61961	0.000211832	http://www.mirbase.org/cgi-bin/mature.pl?mature_acc=MIMAT0022727
hsa-miR-122-5p	93	19	-2.91807	0.000213572	http://www.mirbase.org/cgi-bin/mature.pl?mature_acc=MIMAT0000421
hsa-miR-374a-5p	4890	1286	-2.56363	0.000214716	http://www.mirbase.org/cgi-bin/mature.pl?mature_acc=MIMAT0000727
hsa-miR-370-5p	0	25	7.36905	0.00021796	http://www.mirbase.org/cgi-bin/mature.pl?mature_acc=MIMAT0026483
hsa-miR-483-5p	0	25	7.36905	0.00021796	http://www.mirbase.org/cgi-bin/mature.pl?mature_acc=MIMAT0004761
hsa-miR-582-3p	172	40	-2.73651	0.000227985	http://www.mirbase.org/cgi-bin/mature.pl?mature_acc=MIMAT0004797
hsa-miR-106a-3p	38	6	-3.26738	0.00025588	http://www.mirbase.org/cgi-bin/mature.pl?mature_acc=MIMAT0004517
hsa-miR-323a-3p	62	591	2.61409	0.000259041	http://www.mirbase.org/cgi-bin/mature.pl?mature_acc=MIMAT0000755
hsa-miR-125b-5p	22059	196906	2.52123	0.00026126	http://www.mirbase.org/cgi-bin/mature.pl?mature_acc=MIMAT0000423
hsa-miR-450b-5p	315	80	-2.61181	0.000271156	http://www.mirbase.org/cgi-bin/mature.pl?mature_acc=MIMAT0004909
hsa-miR-127-3p	5380	47774	2.5137	0.00027236	http://www.mirbase.org/cgi-bin/mature.pl?mature_acc=MIMAT0000446
hsa-miR-378b	17	0	-7.44901	0.000290613	http://www.mirbase.org/cgi-bin/mature.pl?mature_acc=MIMAT0014999
hsa-miR-6503-5p	0	24	7.31052	0.000290613	http://www.mirbase.org/cgi-bin/mature.pl?mature_acc=MIMAT0025462
hsa-miR-1468-5p	122	29	-2.70319	0.000361494	http://www.mirbase.org/cgi-bin/mature.pl?mature_acc=MIMAT0006789
hsa-miR-432-5p	74	665	2.52935	0.000371123	http://www.mirbase.org/cgi-bin/mature.pl?mature_acc=MIMAT0002814
hsa-miR-873-3p	16	0	-7.36207	0.000390825	http://www.mirbase.org/cgi-bin/mature.pl?mature_acc=MIMAT0022717
hsa-miR-496	0	23	7.24952	0.000390825	http://www.mirbase.org/cgi-bin/mature.pl?mature_acc=MIMAT0002818
hsa-miR-214-5p	540	4545	2.43621	0.000422427	http://www.mirbase.org/cgi-bin/mature.pl?mature_acc=MIMAT0004564
hsa-miR-323b-3p	10	115	2.87459	0.000436013	http://www.mirbase.org/cgi-bin/mature.pl?mature_acc=MIMAT0015050
hsa-miR-29b-3p	16896	4987	-2.39723	0.000488922	http://www.mirbase.org/cgi-bin/mature.pl?mature_acc=MIMAT0000100
hsa-miR-382-5p	163	1360	2.42313	0.000512137	http://www.mirbase.org/cgi-bin/mature.pl?mature_acc=MIMAT0000737
hsa-miR-433-3p	36	328	2.54755	0.000516586	http://www.mirbase.org/cgi-bin/mature.pl?mature_acc=MIMAT0001627
hsa-miR-7974	0	22	7.18582	0.000530405	http://www.mirbase.org/cgi-bin/mature.pl?mature_acc=MIMAT0031177
hsa-miR-320e	0	22	7.18582	0.000530405	http://www.mirbase.org/cgi-bin/mature.pl?mature_acc=MIMAT0015072
hsa-miR-370-3p	366	2947	2.37219	0.000594311	http://www.mirbase.org/cgi-bin/mature.pl?mature_acc=MIMAT0000722
hsa-miR-3116	14	0	-7.17067	0.000726851	http://www.mirbase.org/cgi-bin/mature.pl?mature_acc=MIMAT0014978
hsa-miR-509-5p	14	0	-7.17067	0.000726851	http://www.mirbase.org/cgi-bin/mature.pl?mature_acc=MIMAT0004779
hsa-miR-892a	14	0	-7.17067	0.000726851	http://www.mirbase.org/cgi-bin/mature.pl?mature_acc=MIMAT0004907
hsa-miR-668-3p	0	21	7.11917	0.000726851	http://www.mirbase.org/cgi-bin/mature.pl?mature_acc=MIMAT0003881
hsa-miR-9983-3p	37	7	-3.01171	0.000755559	http://www.mirbase.org/cgi-bin/mature.pl?mature_acc=MIMAT0041993
hsa-miR-654-5p	47	391	2.41717	0.00076136	http://www.mirbase.org/cgi-bin/mature.pl?mature_acc=MIMAT0003330
hsa-miR-651-5p	236	69	-2.40837	0.000783046	http://www.mirbase.org/cgi-bin/mature.pl?mature_acc=MIMAT0003321
hsa-miR-19b-3p	1810	568	-2.30855	0.000800035	http://www.mirbase.org/cgi-bin/mature.pl?mature_acc=MIMAT0000074
hsa-let-7c-3p	18	166	2.56179	0.000822131	http://www.mirbase.org/cgi-bin/mature.pl?mature_acc=MIMAT0026472
hsa-miR-451a	121329	38815	-2.28106	0.000857922	http://www.mirbase.org/cgi-bin/mature.pl?mature_acc=MIMAT0001631
hsa-miR-548e-3p	48	10	-2.88102	0.000882874	http://www.mirbase.org/cgi-bin/mature.pl?mature_acc=MIMAT0005874
hsa-miR-210-3p	925	294	-2.28987	0.000917132	http://www.mirbase.org/cgi-bin/mature.pl?mature_acc=MIMAT0000267
hsa-miR-338-3p	994	316	-2.2896	0.000920436	http://www.mirbase.org/cgi-bin/mature.pl?mature_acc=MIMAT0000763
hsa-miR-216a-3p	0	20	7.0493	0.00100641	http://www.mirbase.org/cgi-bin/mature.pl?mature_acc=MIMAT0022844
hsa-miR-128-1-5p	0	20	7.0493	0.00100641	http://www.mirbase.org/cgi-bin/mature.pl?mature_acc=MIMAT0026477
hsa-miR-675-5p	0	20	7.0493	0.00100641	http://www.mirbase.org/cgi-bin/mature.pl?mature_acc=MIMAT0004284
hsa-miR-147b-3p	238	73	-2.33941	0.00102236	http://www.mirbase.org/cgi-bin/mature.pl?mature_acc=MIMAT0004928
hsa-miR-628-5p	161	48	-2.37909	0.00105955	http://www.mirbase.org/cgi-bin/mature.pl?mature_acc=MIMAT0004809
hsa-miR-598-3p	719	235	-2.24942	0.00115541	http://www.mirbase.org/cgi-bin/mature.pl?mature_acc=MIMAT0003266
hsa-miR-146b-3p	430	3121	2.22251	0.00120814	http://www.mirbase.org/cgi-bin/mature.pl?mature_acc=MIMAT0004766
hsa-miR-25-5p	27	220	2.38542	0.001234	http://www.mirbase.org/cgi-bin/mature.pl?mature_acc=MIMAT0004498
hsa-miR-1268a	0	18	6.89851	0.00140897	http://www.mirbase.org/cgi-bin/mature.pl?mature_acc=MIMAT0005922
hsa-miR-6511a-5p	0	18	6.89851	0.00140897	http://www.mirbase.org/cgi-bin/mature.pl?mature_acc=MIMAT0025478
hsa-miR-19a-3p	121	37	-2.34148	0.00145907	http://www.mirbase.org/cgi-bin/mature.pl?mature_acc=MIMAT0000073
hsa-miR-150-3p	11	100	2.53701	0.00158136	http://www.mirbase.org/cgi-bin/mature.pl?mature_acc=MIMAT0004610
hsa-miR-203a-3p	14697	5154	-2.14855	0.00161357	http://www.mirbase.org/cgi-bin/mature.pl?mature_acc=MIMAT0000264
hsa-miR-548ad-5p	172	55	-2.27857	0.00163135	http://www.mirbase.org/cgi-bin/mature.pl?mature_acc=MIMAT0032114
hsa-miR-548ae-5p	172	55	-2.27857	0.00163135	http://www.mirbase.org/cgi-bin/mature.pl?mature_acc=MIMAT0032115
hsa-miR-200b-3p	268342	94403	-2.14399	0.00164004	http://www.mirbase.org/cgi-bin/mature.pl?mature_acc=MIMAT0000318
hsa-miR-223-3p	1291	8889	2.14662	0.00164734	http://www.mirbase.org/cgi-bin/mature.pl?mature_acc=MIMAT0000280
hsa-miR-99a-5p	85471	577004	2.11825	0.0018476	http://www.mirbase.org/cgi-bin/mature.pl?mature_acc=MIMAT0000097
hsa-miR-548a-3p	12	0	-6.94995	0.00199605	http://www.mirbase.org/cgi-bin/mature.pl?mature_acc=MIMAT0003251
hsa-miR-642b-5p	12	0	-6.94995	0.00199605	http://www.mirbase.org/cgi-bin/mature.pl?mature_acc=MIMAT0022736
hsa-miR-664b-5p	0	17	6.81676	0.00199605	http://www.mirbase.org/cgi-bin/mature.pl?mature_acc=MIMAT0022271
hsa-miR-4645-3p	0	17	6.81676	0.00199605	http://www.mirbase.org/cgi-bin/mature.pl?mature_acc=MIMAT0019706
hsa-miR-597-3p	0	17	6.81676	0.00199605	http://www.mirbase.org/cgi-bin/mature.pl?mature_acc=MIMAT0026619
hsa-miR-99a-3p	65	452	2.1593	0.00229018	http://www.mirbase.org/cgi-bin/mature.pl?mature_acc=MIMAT0004511
hsa-miR-223-5p	203	1337	2.08209	0.00247782	http://www.mirbase.org/cgi-bin/mature.pl?mature_acc=MIMAT0004570
hsa-miR-3609	0	16	6.7301	0.00286389	http://www.mirbase.org/cgi-bin/mature.pl?mature_acc=MIMAT0017986
hsa-miR-1226-3p	0	16	6.7301	0.00286389	http://www.mirbase.org/cgi-bin/mature.pl?mature_acc=MIMAT0005577
hsa-miR-511-5p	93	610	2.07552	0.00297115	http://www.mirbase.org/cgi-bin/mature.pl?mature_acc=MIMAT0002808
hsa-miR-642a-3p	25	6	-2.66523	0.00330473	http://www.mirbase.org/cgi-bin/mature.pl?mature_acc=MIMAT0020924
hsa-miR-340-5p	5914	2369	-1.95662	0.00386929	http://www.mirbase.org/cgi-bin/mature.pl?mature_acc=MIMAT0004692
hsa-miR-200a-5p	7989	3224	-1.94594	0.00404328	http://www.mirbase.org/cgi-bin/mature.pl?mature_acc=MIMAT0001620
hsa-miR-29b-1-5p	5	52	2.71794	0.00404627	http://www.mirbase.org/cgi-bin/mature.pl?mature_acc=MIMAT0004514
hsa-miR-342-5p	48	307	2.03808	0.00406897	http://www.mirbase.org/cgi-bin/mature.pl?mature_acc=MIMAT0004694
hsa-miR-509-3-5p	10	0	-6.68925	0.00416566	http://www.mirbase.org/cgi-bin/mature.pl?mature_acc=MIMAT0004975
hsa-miR-4679	10	0	-6.68925	0.00416566	http://www.mirbase.org/cgi-bin/mature.pl?mature_acc=MIMAT0019763
hsa-miR-301b-3p	10	0	-6.68925	0.00416566	http://www.mirbase.org/cgi-bin/mature.pl?mature_acc=MIMAT0004958
hsa-miR-548s	10	0	-6.68925	0.00416566	http://www.mirbase.org/cgi-bin/mature.pl?mature_acc=MIMAT0014987
hsa-miR-548b-5p	10	0	-6.68925	0.00416566	http://www.mirbase.org/cgi-bin/mature.pl?mature_acc=MIMAT0004798
hsa-miR-4677-5p	10	0	-6.68925	0.00416566	http://www.mirbase.org/cgi-bin/mature.pl?mature_acc=MIMAT0019760
hsa-miR-876-5p	10	0	-6.68925	0.00416566	http://www.mirbase.org/cgi-bin/mature.pl?mature_acc=MIMAT0004924
hsa-miR-135b-3p	0	15	6.63789	0.00416566	http://www.mirbase.org/cgi-bin/mature.pl?mature_acc=MIMAT0004698
hsa-miR-3129-3p	0	15	6.63789	0.00416566	http://www.mirbase.org/cgi-bin/mature.pl?mature_acc=MIMAT0019202
hsa-miR-516b-5p	0	14	6.53939	0.00416566	http://www.mirbase.org/cgi-bin/mature.pl?mature_acc=MIMAT0002859
hsa-miR-92a-1-5p	22	153	2.15616	0.00421294	http://www.mirbase.org/cgi-bin/mature.pl?mature_acc=MIMAT0004507
hsa-miR-369-5p	43	273	2.02719	0.00453567	http://www.mirbase.org/cgi-bin/mature.pl?mature_acc=MIMAT0001621
hsa-miR-296-3p	5	51	2.69001	0.00463965	http://www.mirbase.org/cgi-bin/mature.pl?mature_acc=MIMAT0004679
hsa-miR-625-3p	895	368	-1.91857	0.00495258	http://www.mirbase.org/cgi-bin/mature.pl?mature_acc=MIMAT0004808
hsa-miR-378a-3p	55847	23567	-1.88153	0.00531087	http://www.mirbase.org/cgi-bin/mature.pl?mature_acc=MIMAT0000732
hsa-miR-378i	8330	3518	-1.88034	0.00537086	http://www.mirbase.org/cgi-bin/mature.pl?mature_acc=MIMAT0019074
hsa-miR-576-3p	95	36	-2.03216	0.00540927	http://www.mirbase.org/cgi-bin/mature.pl?mature_acc=MIMAT0004796
hsa-miR-206	29	8	-2.47249	0.00547185	http://www.mirbase.org/cgi-bin/mature.pl?mature_acc=MIMAT0000462
hsa-miR-548aq-3p	29	8	-2.47249	0.00547185	http://www.mirbase.org/cgi-bin/mature.pl?mature_acc=MIMAT0022264
hsa-miR-504-5p	135	791	1.91312	0.00548055	http://www.mirbase.org/cgi-bin/mature.pl?mature_acc=MIMAT0002875
hsa-miR-134-5p	217	1253	1.89232	0.00561284	http://www.mirbase.org/cgi-bin/mature.pl?mature_acc=MIMAT0000447
hsa-miR-548ay-5p	112	43	-2.01408	0.00567616	http://www.mirbase.org/cgi-bin/mature.pl?mature_acc=MIMAT0025452
hsa-miR-215-3p	34	213	2.0073	0.00585531	http://www.mirbase.org/cgi-bin/mature.pl?mature_acc=MIMAT0026476
hsa-miR-100-5p	25331	142810	1.85829	0.00586476	http://www.mirbase.org/cgi-bin/mature.pl?mature_acc=MIMAT0000098
hsa-miR-30d-3p	501	211	-1.88364	0.00609858	http://www.mirbase.org/cgi-bin/mature.pl?mature_acc=MIMAT0004551
hsa-miR-378j	9	0	-6.5388	0.00614931	http://www.mirbase.org/cgi-bin/mature.pl?mature_acc=MIMAT0024612
hsa-miR-376a-2-5p	9	0	-6.5388	0.00614931	http://www.mirbase.org/cgi-bin/mature.pl?mature_acc=MIMAT0022928
hsa-miR-548v	9	0	-6.5388	0.00614931	http://www.mirbase.org/cgi-bin/mature.pl?mature_acc=MIMAT0015020
hsa-miR-1273h-5p	0	13	6.43367	0.00614931	http://www.mirbase.org/cgi-bin/mature.pl?mature_acc=MIMAT0030415
hsa-miR-615-3p	16	106	2.08437	0.00637124	http://www.mirbase.org/cgi-bin/mature.pl?mature_acc=MIMAT0003283
hsa-miR-543	128	731	1.8761	0.00639302	http://www.mirbase.org/cgi-bin/mature.pl?mature_acc=MIMAT0004954
hsa-miR-3613-5p	187	77	-1.91484	0.00655094	http://www.mirbase.org/cgi-bin/mature.pl?mature_acc=MIMAT0017990
hsa-let-7c-5p	12313	68059	1.82977	0.0066248	http://www.mirbase.org/cgi-bin/mature.pl?mature_acc=MIMAT0000064
hsa-miR-147b-5p	25	7	-2.44794	0.00666491	http://www.mirbase.org/cgi-bin/mature.pl?mature_acc=MIMAT0037331
hsa-miR-412-5p	14	96	2.13302	0.00675037	http://www.mirbase.org/cgi-bin/mature.pl?mature_acc=MIMAT0026557
hsa-miR-378g	171	70	-1.92309	0.00676971	http://www.mirbase.org/cgi-bin/mature.pl?mature_acc=MIMAT0018937
hsa-miR-556-3p	22	6	-2.48157	0.00697492	http://www.mirbase.org/cgi-bin/mature.pl?mature_acc=MIMAT0004793
hsa-miR-202-5p	124	51	-1.91544	0.00737042	http://www.mirbase.org/cgi-bin/mature.pl?mature_acc=MIMAT0002810
hsa-miR-34c-5p	149	826	1.83332	0.00744507	http://www.mirbase.org/cgi-bin/mature.pl?mature_acc=MIMAT0000686
hsa-miR-29c-5p	2293	1020	-1.80534	0.00756018	http://www.mirbase.org/cgi-bin/mature.pl?mature_acc=MIMAT0004673
hsa-miR-493-3p	252	1368	1.80334	0.00806456	http://www.mirbase.org/cgi-bin/mature.pl?mature_acc=MIMAT0003161
hsa-miR-199a-5p	46729	249552	1.78012	0.00814643	http://www.mirbase.org/cgi-bin/mature.pl?mature_acc=MIMAT0000231
hsa-miR-329-3p	164	888	1.79942	0.00851588	http://www.mirbase.org/cgi-bin/mature.pl?mature_acc=MIMAT0001629
hsa-miR-642a-5p	93	38	-1.92381	0.00896593	http://www.mirbase.org/cgi-bin/mature.pl?mature_acc=MIMAT0003312
hsa-miR-30a-5p	79511	36611	-1.7557	0.00901429	http://www.mirbase.org/cgi-bin/mature.pl?mature_acc=MIMAT0000087
hsa-miR-1179	8	0	-6.37081	0.00922396	http://www.mirbase.org/cgi-bin/mature.pl?mature_acc=MIMAT0005824
hsa-miR-6515-5p	8	0	-6.37081	0.00922396	http://www.mirbase.org/cgi-bin/mature.pl?mature_acc=MIMAT0025486
hsa-miR-3616-5p	8	0	-6.37081	0.00922396	http://www.mirbase.org/cgi-bin/mature.pl?mature_acc=MIMAT0017995
hsa-miR-548ai	8	0	-6.37081	0.00922396	http://www.mirbase.org/cgi-bin/mature.pl?mature_acc=MIMAT0018989
hsa-miR-548ae-3p	8	0	-6.37081	0.00922396	http://www.mirbase.org/cgi-bin/mature.pl?mature_acc=MIMAT0018954
hsa-miR-570-5p	8	0	-6.37081	0.00922396	http://www.mirbase.org/cgi-bin/mature.pl?mature_acc=MIMAT0022707
hsa-miR-6516-3p	8	0	-6.37081	0.00922396	http://www.mirbase.org/cgi-bin/mature.pl?mature_acc=MIMAT0030418
hsa-miR-4661-5p	0	12	6.31958	0.00922396	http://www.mirbase.org/cgi-bin/mature.pl?mature_acc=MIMAT0019729
hsa-miR-124-3p	0	12	6.31958	0.00922396	http://www.mirbase.org/cgi-bin/mature.pl?mature_acc=MIMAT0000422
hsa-miR-5196-3p	0	12	6.31958	0.00922396	http://www.mirbase.org/cgi-bin/mature.pl?mature_acc=MIMAT0021129
hsa-miR-346	0	12	6.31958	0.00922396	http://www.mirbase.org/cgi-bin/mature.pl?mature_acc=MIMAT0000773
hsa-miR-6859-5p	0	12	6.31958	0.00922396	http://www.mirbase.org/cgi-bin/mature.pl?mature_acc=MIMAT0027618
hsa-miR-489-3p	0	12	6.31958	0.00922396	http://www.mirbase.org/cgi-bin/mature.pl?mature_acc=MIMAT0002805
hsa-miR-4709-3p	0	12	6.31958	0.00922396	http://www.mirbase.org/cgi-bin/mature.pl?mature_acc=MIMAT0019812
hsa-miR-196a-3p	0	12	6.31958	0.00922396	http://www.mirbase.org/cgi-bin/mature.pl?mature_acc=MIMAT0004562
hsa-miR-335-3p	379	1975	1.74449	0.00996396	http://www.mirbase.org/cgi-bin/mature.pl?mature_acc=MIMAT0004703
hsa-miR-493-5p	678	3516	1.7376	0.010012	http://www.mirbase.org/cgi-bin/mature.pl?mature_acc=MIMAT0002813
hsa-miR-10399-3p	32	180	1.85184	0.0104387	http://www.mirbase.org/cgi-bin/mature.pl?mature_acc=MIMAT0041630
hsa-miR-485-5p	31	174	1.84863	0.0111768	http://www.mirbase.org/cgi-bin/mature.pl?mature_acc=MIMAT0002175
hsa-miR-548i	68	28	-1.91119	0.0114978	http://www.mirbase.org/cgi-bin/mature.pl?mature_acc=MIMAT0005935
hsa-miR-625-5p	197	90	-1.76531	0.0118662	http://www.mirbase.org/cgi-bin/mature.pl?mature_acc=MIMAT0003294
hsa-miR-422a	130	58	-1.79852	0.0119175	http://www.mirbase.org/cgi-bin/mature.pl?mature_acc=MIMAT0001339
hsa-miR-212-5p	77	403	1.74973	0.0122048	http://www.mirbase.org/cgi-bin/mature.pl?mature_acc=MIMAT0022695
hsa-miR-135a-2-3p	20	6	-2.34471	0.0126381	http://www.mirbase.org/cgi-bin/mature.pl?mature_acc=MIMAT0037309
hsa-miR-320d	61	321	1.75724	0.0127054	http://www.mirbase.org/cgi-bin/mature.pl?mature_acc=MIMAT0006764
hsa-miR-342-3p	2265	11181	1.6666	0.0130301	http://www.mirbase.org/cgi-bin/mature.pl?mature_acc=MIMAT0000753
hsa-let-7f-2-3p	170	79	-1.74049	0.0135337	http://www.mirbase.org/cgi-bin/mature.pl?mature_acc=MIMAT0004487
hsa-miR-20b-5p	865	424	-1.66511	0.0139346	http://www.mirbase.org/cgi-bin/mature.pl?mature_acc=MIMAT0001413
hsa-miR-4781-3p	0	11	6.19569	0.0140787	http://www.mirbase.org/cgi-bin/mature.pl?mature_acc=MIMAT0019943
hsa-miR-6504-5p	0	11	6.19569	0.0140787	http://www.mirbase.org/cgi-bin/mature.pl?mature_acc=MIMAT0025464
hsa-miR-134-3p	0	11	6.19569	0.0140787	http://www.mirbase.org/cgi-bin/mature.pl?mature_acc=MIMAT0026481
hsa-miR-4448	0	11	6.19569	0.0140787	http://www.mirbase.org/cgi-bin/mature.pl?mature_acc=MIMAT0018967
hsa-miR-541-5p	0	11	6.19569	0.0140787	http://www.mirbase.org/cgi-bin/mature.pl?mature_acc=MIMAT0004919
hsa-miR-1245a	0	11	6.19569	0.0140787	http://www.mirbase.org/cgi-bin/mature.pl?mature_acc=MIMAT0005897
hsa-miR-136-3p	425	207	-1.67393	0.0145045	http://www.mirbase.org/cgi-bin/mature.pl?mature_acc=MIMAT0004606
hsa-miR-200c-3p	117807	59316	-1.62676	0.0151378	http://www.mirbase.org/cgi-bin/mature.pl?mature_acc=MIMAT0000617
hsa-miR-195-3p	188	919	1.65199	0.0151486	http://www.mirbase.org/cgi-bin/mature.pl?mature_acc=MIMAT0004615
hsa-miR-4775	19	6	-2.27108	0.0155141	http://www.mirbase.org/cgi-bin/mature.pl?mature_acc=MIMAT0019931
hsa-miR-136-5p	57	24	-1.87811	0.0157544	http://www.mirbase.org/cgi-bin/mature.pl?mature_acc=MIMAT0000448
hsa-miR-328-3p	487	2321	1.61573	0.0164613	http://www.mirbase.org/cgi-bin/mature.pl?mature_acc=MIMAT0000752
hsa-miR-181b-5p	3498	16532	1.6038	0.0166361	http://www.mirbase.org/cgi-bin/mature.pl?mature_acc=MIMAT0000257
hsa-miR-409-5p	168	805	1.62313	0.0171937	http://www.mirbase.org/cgi-bin/mature.pl?mature_acc=MIMAT0001638
hsa-miR-296-5p	5	39	2.3043	0.0171989	http://www.mirbase.org/cgi-bin/mature.pl?mature_acc=MIMAT0000690
hsa-miR-1273h-3p	5	39	2.3043	0.0171989	http://www.mirbase.org/cgi-bin/mature.pl?mature_acc=MIMAT0030416
hsa-miR-1250-5p	60	27	-1.78308	0.0183681	http://www.mirbase.org/cgi-bin/mature.pl?mature_acc=MIMAT0005902
hsa-miR-539-3p	18	5	-2.4494	0.0191124	http://www.mirbase.org/cgi-bin/mature.pl?mature_acc=MIMAT0022705
hsa-miR-548d-5p	76	36	-1.7106	0.0194266	http://www.mirbase.org/cgi-bin/mature.pl?mature_acc=MIMAT0004812
hsa-miR-548o-5p	23	8	-2.13933	0.0199098	http://www.mirbase.org/cgi-bin/mature.pl?mature_acc=MIMAT0022738
hsa-miR-548am-5p	23	8	-2.13933	0.0199098	http://www.mirbase.org/cgi-bin/mature.pl?mature_acc=MIMAT0022740
hsa-miR-548c-5p	23	8	-2.13933	0.0199098	http://www.mirbase.org/cgi-bin/mature.pl?mature_acc=MIMAT0004806
hsa-miR-200c-5p	42	18	-1.85043	0.0200703	http://www.mirbase.org/cgi-bin/mature.pl?mature_acc=MIMAT0004657
hsa-miR-548au-5p	37	15	-1.92864	0.020157	http://www.mirbase.org/cgi-bin/mature.pl?mature_acc=MIMAT0022291
hsa-miR-499a-5p	165	83	-1.62632	0.0201827	http://www.mirbase.org/cgi-bin/mature.pl?mature_acc=MIMAT0002870
hsa-miR-7706	36	177	1.65818	0.021205	http://www.mirbase.org/cgi-bin/mature.pl?mature_acc=MIMAT0030021
hsa-miR-12136	74	36	-1.67218	0.0217434	http://www.mirbase.org/cgi-bin/mature.pl?mature_acc=MIMAT0049032
hsa-miR-494-3p	304	1384	1.54957	0.0218309	http://www.mirbase.org/cgi-bin/mature.pl?mature_acc=MIMAT0002816
hsa-miR-934	7	0	-6.18065	0.0219002	http://www.mirbase.org/cgi-bin/mature.pl?mature_acc=MIMAT0004977
hsa-miR-548bc	7	0	-6.18065	0.0219002	http://www.mirbase.org/cgi-bin/mature.pl?mature_acc=MIMAT0039765
hsa-miR-548ab	7	0	-6.18065	0.0219002	http://www.mirbase.org/cgi-bin/mature.pl?mature_acc=MIMAT0018928
hsa-miR-4802-3p	7	0	-6.18065	0.0219002	http://www.mirbase.org/cgi-bin/mature.pl?mature_acc=MIMAT0019982
hsa-miR-6761-5p	7	0	-6.18065	0.0219002	http://www.mirbase.org/cgi-bin/mature.pl?mature_acc=MIMAT0027422
hsa-miR-488-3p	7	0	-6.18065	0.0219002	http://www.mirbase.org/cgi-bin/mature.pl?mature_acc=MIMAT0004763
hsa-miR-4676-3p	7	0	-6.18065	0.0219002	http://www.mirbase.org/cgi-bin/mature.pl?mature_acc=MIMAT0019759
hsa-miR-5582-3p	7	0	-6.18065	0.0219002	http://www.mirbase.org/cgi-bin/mature.pl?mature_acc=MIMAT0022280
hsa-miR-6128	7	0	-6.18065	0.0219002	http://www.mirbase.org/cgi-bin/mature.pl?mature_acc=MIMAT0024611
hsa-miR-652-5p	0	10	6.06016	0.0219002	http://www.mirbase.org/cgi-bin/mature.pl?mature_acc=MIMAT0022709
hsa-miR-3157-5p	0	10	6.06016	0.0219002	http://www.mirbase.org/cgi-bin/mature.pl?mature_acc=MIMAT0015031
hsa-miR-4659a-3p	0	10	6.06016	0.0219002	http://www.mirbase.org/cgi-bin/mature.pl?mature_acc=MIMAT0019727
hsa-miR-1247-3p	0	10	6.06016	0.0219002	http://www.mirbase.org/cgi-bin/mature.pl?mature_acc=MIMAT0022721
hsa-miR-219a-1-3p	0	10	6.06016	0.0219002	http://www.mirbase.org/cgi-bin/mature.pl?mature_acc=MIMAT0004567
hsa-miR-23a-5p	0	10	6.06016	0.0219002	http://www.mirbase.org/cgi-bin/mature.pl?mature_acc=MIMAT0004496
hsa-miR-3129-5p	0	10	6.06016	0.0219002	http://www.mirbase.org/cgi-bin/mature.pl?mature_acc=MIMAT0014992
hsa-miR-3622a-5p	0	10	6.06016	0.0219002	http://www.mirbase.org/cgi-bin/mature.pl?mature_acc=MIMAT0018003
hsa-miR-329-5p	0	10	6.06016	0.0219002	http://www.mirbase.org/cgi-bin/mature.pl?mature_acc=MIMAT0026555
hsa-miR-4421	0	10	6.06016	0.0219002	http://www.mirbase.org/cgi-bin/mature.pl?mature_acc=MIMAT0018934
hsa-miR-181a-3p	254	1148	1.53903	0.0227248	http://www.mirbase.org/cgi-bin/mature.pl?mature_acc=MIMAT0000270
hsa-miR-155-5p	5501	24378	1.51097	0.0236695	http://www.mirbase.org/cgi-bin/mature.pl?mature_acc=MIMAT0000646
hsa-miR-654-3p	692	3066	1.51055	0.02421	http://www.mirbase.org/cgi-bin/mature.pl?mature_acc=MIMAT0004814
hsa-miR-30b-5p	27528	15165	-1.49697	0.0249004	http://www.mirbase.org/cgi-bin/mature.pl?mature_acc=MIMAT0000420
hsa-miR-299-5p	42	198	1.59796	0.0260114	http://www.mirbase.org/cgi-bin/mature.pl?mature_acc=MIMAT0002890
hsa-miR-542-3p	128	67	-1.56857	0.0260114	http://www.mirbase.org/cgi-bin/mature.pl?mature_acc=MIMAT0003389
hsa-miR-92b-3p	709	3089	1.48633	0.0265685	http://www.mirbase.org/cgi-bin/mature.pl?mature_acc=MIMAT0003218
hsa-miR-5701	30	144	1.62303	0.0271084	http://www.mirbase.org/cgi-bin/mature.pl?mature_acc=MIMAT0022494
hsa-miR-181a-5p	21192	91442	1.4725	0.027246	http://www.mirbase.org/cgi-bin/mature.pl?mature_acc=MIMAT0000256
hsa-miR-92a-3p	25909	111307	1.46619	0.0278833	http://www.mirbase.org/cgi-bin/mature.pl?mature_acc=MIMAT0000092
hsa-miR-199b-3p	171926	737860	1.46473	0.028018	http://www.mirbase.org/cgi-bin/mature.pl?mature_acc=MIMAT0004563
hsa-miR-199a-3p	171926	737860	1.46473	0.028018	http://www.mirbase.org/cgi-bin/mature.pl?mature_acc=MIMAT0000232
hsa-miR-1185-1-3p	28	131	1.58588	0.0307537	http://www.mirbase.org/cgi-bin/mature.pl?mature_acc=MIMAT0022838
hsa-miR-1180-3p	168	721	1.46417	0.0309802	http://www.mirbase.org/cgi-bin/mature.pl?mature_acc=MIMAT0005825
hsa-miR-6511a-3p	20	96	1.62145	0.0323152	http://www.mirbase.org/cgi-bin/mature.pl?mature_acc=MIMAT0025479
hsa-miR-96-5p	4232	2468	-1.41477	0.0338821	http://www.mirbase.org/cgi-bin/mature.pl?mature_acc=MIMAT0000095
hsa-miR-548ay-3p	6	0	-5.96157	0.0347826	http://www.mirbase.org/cgi-bin/mature.pl?mature_acc=MIMAT0025453
hsa-miR-6755-5p	6	0	-5.96157	0.0347826	http://www.mirbase.org/cgi-bin/mature.pl?mature_acc=MIMAT0027410
hsa-miR-33a-5p	6	0	-5.96157	0.0347826	http://www.mirbase.org/cgi-bin/mature.pl?mature_acc=MIMAT0000091
hsa-miR-1289	6	0	-5.96157	0.0347826	http://www.mirbase.org/cgi-bin/mature.pl?mature_acc=MIMAT0005879
hsa-miR-4639-5p	6	0	-5.96157	0.0347826	http://www.mirbase.org/cgi-bin/mature.pl?mature_acc=MIMAT0019697
hsa-miR-1251-5p	6	0	-5.96157	0.0347826	http://www.mirbase.org/cgi-bin/mature.pl?mature_acc=MIMAT0005903
hsa-miR-3200-5p	6	0	-5.96157	0.0347826	http://www.mirbase.org/cgi-bin/mature.pl?mature_acc=MIMAT0017392
hsa-miR-6770-5p	6	0	-5.96157	0.0347826	http://www.mirbase.org/cgi-bin/mature.pl?mature_acc=MIMAT0027440
hsa-miR-2355-5p	0	9	5.91055	0.0347826	http://www.mirbase.org/cgi-bin/mature.pl?mature_acc=MIMAT0016895
hsa-miR-6770-3p	0	9	5.91055	0.0347826	http://www.mirbase.org/cgi-bin/mature.pl?mature_acc=MIMAT0027441
hsa-miR-4708-3p	0	9	5.91055	0.0347826	http://www.mirbase.org/cgi-bin/mature.pl?mature_acc=MIMAT0019810
hsa-miR-500b-3p	0	9	5.91055	0.0347826	http://www.mirbase.org/cgi-bin/mature.pl?mature_acc=MIMAT0027032
hsa-miR-1268b	0	9	5.91055	0.0347826	http://www.mirbase.org/cgi-bin/mature.pl?mature_acc=MIMAT0018925
hsa-miR-184	0	9	5.91055	0.0347826	http://www.mirbase.org/cgi-bin/mature.pl?mature_acc=MIMAT0000454
hsa-miR-433-5p	0	9	5.91055	0.0347826	http://www.mirbase.org/cgi-bin/mature.pl?mature_acc=MIMAT0026554
hsa-miR-196a-1-3p	0	8	5.74362	0.0347826	http://www.mirbase.org/cgi-bin/mature.pl?mature_acc=MIMAT0037307
hsa-miR-4746-5p	0	8	5.74362	0.0347826	http://www.mirbase.org/cgi-bin/mature.pl?mature_acc=MIMAT0019880
hsa-miR-4772-3p	0	8	5.74362	0.0347826	http://www.mirbase.org/cgi-bin/mature.pl?mature_acc=MIMAT0019927
hsa-miR-3144-3p	0	8	5.74362	0.0347826	http://www.mirbase.org/cgi-bin/mature.pl?mature_acc=MIMAT0015015
hsa-miR-183-3p	0	8	5.74362	0.0347826	http://www.mirbase.org/cgi-bin/mature.pl?mature_acc=MIMAT0004560
hsa-miR-589-3p	0	8	5.74362	0.0347826	http://www.mirbase.org/cgi-bin/mature.pl?mature_acc=MIMAT0003256
hsa-miR-29a-5p	0	8	5.74362	0.0347826	http://www.mirbase.org/cgi-bin/mature.pl?mature_acc=MIMAT0004503
hsa-miR-3140-3p	0	8	5.74362	0.0347826	http://www.mirbase.org/cgi-bin/mature.pl?mature_acc=MIMAT0015008
hsa-miR-33b-3p	0	8	5.74362	0.0347826	http://www.mirbase.org/cgi-bin/mature.pl?mature_acc=MIMAT0004811
hsa-miR-6513-5p	0	8	5.74362	0.0347826	http://www.mirbase.org/cgi-bin/mature.pl?mature_acc=MIMAT0025482
hsa-miR-4485-3p	0	8	5.74362	0.0347826	http://www.mirbase.org/cgi-bin/mature.pl?mature_acc=MIMAT0019019
hsa-miR-549a-3p	0	8	5.74362	0.0347826	http://www.mirbase.org/cgi-bin/mature.pl?mature_acc=MIMAT0003333
hsa-miR-487b-5p	0	8	5.74362	0.0347826	http://www.mirbase.org/cgi-bin/mature.pl?mature_acc=MIMAT0026614
hsa-miR-6815-5p	0	8	5.74362	0.0347826	http://www.mirbase.org/cgi-bin/mature.pl?mature_acc=MIMAT0027530
hsa-miR-4536-5p	0	8	5.74362	0.0347826	http://www.mirbase.org/cgi-bin/mature.pl?mature_acc=MIMAT0019078
hsa-miR-512-3p	0	8	5.74362	0.0347826	http://www.mirbase.org/cgi-bin/mature.pl?mature_acc=MIMAT0002823
hsa-miR-508-3p	16	5	-2.28045	0.0365207	http://www.mirbase.org/cgi-bin/mature.pl?mature_acc=MIMAT0002880
hsa-miR-224-5p	497	2033	1.39529	0.0371437	http://www.mirbase.org/cgi-bin/mature.pl?mature_acc=MIMAT0000281
hsa-miR-363-3p	5495	3282	-1.38033	0.0382267	http://www.mirbase.org/cgi-bin/mature.pl?mature_acc=MIMAT0000707
hsa-miR-3615	247	1010	1.39459	0.0389951	http://www.mirbase.org/cgi-bin/mature.pl?mature_acc=MIMAT0017994
hsa-miR-3688-3p	24	10	-1.88395	0.0421466	http://www.mirbase.org/cgi-bin/mature.pl?mature_acc=MIMAT0018116
hsa-miR-26a-2-3p	100	56	-1.47083	0.0422441	http://www.mirbase.org/cgi-bin/mature.pl?mature_acc=MIMAT0004681
hsa-miR-487a-3p	16	74	1.56679	0.042332	http://www.mirbase.org/cgi-bin/mature.pl?mature_acc=MIMAT0002178
hsa-miR-152-5p	23	103	1.52212	0.0424823	http://www.mirbase.org/cgi-bin/mature.pl?mature_acc=MIMAT0026479
hsa-miR-192-5p	234329	143265	-1.34668	0.0427611	http://www.mirbase.org/cgi-bin/mature.pl?mature_acc=MIMAT0000222
hsa-miR-182-3p	28	13	-1.73199	0.0434223	http://www.mirbase.org/cgi-bin/mature.pl?mature_acc=MIMAT0000260
hsa-miR-335-5p	156	91	-1.41293	0.0438375	http://www.mirbase.org/cgi-bin/mature.pl?mature_acc=MIMAT0000765
hsa-miR-129-1-3p	32	15	-1.71978	0.0442626	http://www.mirbase.org/cgi-bin/mature.pl?mature_acc=MIMAT0004548
hsa-miR-10400-5p	21	9	-1.84174	0.0447917	http://www.mirbase.org/cgi-bin/mature.pl?mature_acc=MIMAT0041631
hsa-miR-33a-3p	82	47	-1.43685	0.0454394	http://www.mirbase.org/cgi-bin/mature.pl?mature_acc=MIMAT0004506
hsa-miR-378a-5p	704	432	-1.34106	0.0458564	http://www.mirbase.org/cgi-bin/mature.pl?mature_acc=MIMAT0000731
hsa-miR-3200-3p	29	14	-1.67672	0.046668	http://www.mirbase.org/cgi-bin/mature.pl?mature_acc=MIMAT0015085
hsa-miR-130b-3p	330	201	-1.35143	0.046963	http://www.mirbase.org/cgi-bin/mature.pl?mature_acc=MIMAT0000691
hsa-miR-139-5p	2162	8402	1.3215	0.0469731	http://www.mirbase.org/cgi-bin/mature.pl?mature_acc=MIMAT0000250
hsa-miR-4791	41	22	-1.52844	0.0474936	http://www.mirbase.org/cgi-bin/mature.pl?mature_acc=MIMAT0019963
hsa-miR-505-3p	594	2293	1.31173	0.0494973	http://www.mirbase.org/cgi-bin/mature.pl?mature_acc=MIMAT0002876
hsa-miR-132-5p	425	1640	1.31113	0.0498528	http://www.mirbase.org/cgi-bin/mature.pl?mature_acc=MIMAT0004594
